# Supplementary material
Source: PubMed Central journal article supplement (PMC3663558)

*Supplemental Data*

SD Table S1. Peptides from E2 selected for HDX-MS analysis

| No. | Position                | Peptides<br>Sequence                           | Monoisotopic Mass<br>[M+H] (Da) |             | Error<br>(ppm) |
|-----|-------------------------|------------------------------------------------|---------------------------------|-------------|----------------|
|     |                         |                                                | Experimental                    | Theoretical |                |
| 1   | 4-13                    | IKVPDIGADE                                     | 1056.5583                       | 1056.5572   | 1.0            |
| 2   | 16-20                   | ITEIL                                          | 588.3607                        | 588.3603    | 0.6            |
| 3   | 21-33, 124-136          | VKVGDKVEAEQSL                                  | 1401.7587                       | 1401.7584   | 0.2            |
| 4   | 34-43, 137-146, 238-247 | ITVEGDK(Lip)ASM                                | 1238.5456                       | 1238.5465   | -0.8           |
| 5   | 44-51                   | EVPSQAG                                        | 784.3838                        | 784.3836    | 0.2            |
| 6   | 56-69, 159-172          | IKVNVGDKVSTGSL                                 | 1416.8063                       | 1416.8057   | 0.5            |
| 7   | 70-80                   | IMIFDSADGAA                                    | 1110.5140                       | 1110.5136   | 0.4            |
| 8   | 278-319                 | EVEGAAPAAAPAKQEAAVPAPAA<br>KAEAPAAAPAACAEGKSEF | 3912.0152                       | 3912.0138   | 0.4            |
| 9   | 325-338                 | YVHATPLIRRLARE                                 | 1694.9818                       | 1694.9813   | 0.3            |
| 10  | 339-343                 | FGVNL                                          | 549.3035                        | 549.3031    | 0.7            |
| 11  | 363-393                 | YVKEAIKRAEAAPAATGGGIPGM<br>LPWPKVDF            | 3240.7231                       | 3240.7238   | -0.2           |
| 12  | 394-401                 | SKFGEIEE                                       | 938.4465                        | 938.4466    | -0.1           |
| 13  | 402-415                 | VELGRIQKISGANL                                 | 1497.8755                       | 1497.8748   | 0.5            |
| 14  | 419-428                 | WVMIPHVTHF                                     | 1266.6456                       | 1266.6452   | 0.3            |
| 15  | 439-461                 | FRKQQNEEAARKKLDVKITPVVF                        | 2744.5609                       | 2744.5570   | 1.4            |
| 16  | 462-467                 | IMKAVA                                         | 632.3800                        | 632.3800    | 0.0            |
| 17  | 471-476                 | EQMPRF                                         | 807.3831                        | 807.3818    | 1.6            |
| 18  | 477-496                 | NSSLSEDGQRLTLKKYINIG                           | 2236.1931                       | 2236.1932   | 0.0            |
| 19  | 498-506                 | AVDTPNGLV                                      | 885.4677                        | 885.4676    | 0.1            |
| 20  | 508-521                 | PVFKDVNKKGIHEL                                 | 1599.9482                       | 1599.9469   | 0.8            |
| 21  | 548-566                 | TISSIGGLGTTHFAPIVNA                            | 1855.9897                       | 1855.9912   | -0.8           |
| 22  | 567-572                 | PEVAIL                                         | 641.3873                        | 641.3869    | 0.8            |
| 23  | 573-594                 | GVSKSAMEPVWNGKEFVPRMLL                         | 2475.2884                       | 2475.2887   | -0.1           |
| 24  | 599-613                 | SFDHRVIDGADGARF                                | 1662.7989                       | 1662.7983   | 0.4            |
| 25  | 614-623                 | ITIINNTLSL                                     | 1103.5931                       | 1103.5943   | -1.1           |

SD Table S2. Peptides from E3 selected for DXMS analysis

| No. | Position | Peptides<br>Sequence                               | Monoisotopic Mass<br>[M+H] (Da) |             | Error<br>(ppm) |
|-----|----------|----------------------------------------------------|---------------------------------|-------------|----------------|
|     |          |                                                    | Experimental                    | Theoretical |                |
| 1   | 2-9      | STEIKTQV                                           | 905.4935                        | 905.4938    | -0.3           |
| 2   | 10-22    | VVLGAGPAGYSAA                                      | 1132.6000                       | 1132.5997   | 0.2            |
| 3   | 23-30    | FRCADLGL                                           | 894.4504                        | 894.4502    | 0.3            |
| 4   | 33-57    | VIVERYNTLGGVCLNVGCIP<br>SKALL (C-C disulfide bond) | 2629.4191                       | 2629.4204   | -0.5           |
| 5   | 58-65    | HVAKVIEE                                           | 924.5147                        | 924.5149    | -0.2           |
| 6   | 66-88    | AKALAEHGIVFGEPKTDIDKI<br>RT                        | 2509.3824                       | 2509.3773   | 2.0            |
| 7   | 89-125   | WKEKVINQLTGGLAGMAK<br>GRKVKVVNGLGKFTGANTL          | 3884.2073                       | 3884.2055   | 0.5            |
| 8   | 126-138  | EVEGENGKTVINP                                      | 1435.7070                       | 1435.7063   | 0.5            |
| 9   | 139-152  | DNAIIAAGSRPIQL                                     | 1438.8016                       | 1438.8013   | 0.3            |
| 10  | 153-169  | PFIPHEDPRIWDSTDAL                                  | 2008.9769                       | 2008.9763   | 0.3            |
| 11  | 170-178  | ELKEVPERL                                          | 1112.6317                       | 1112.6310   | 0.6            |
| 12  | 179-187  | LVMGGGIIG                                          | 816.4640                        | 816.4648    | -1.0           |
| 13  | 188-200  | LEMGTVYHALGSQ                                      | 1405.6783                       | 1405.6780   | 0.2            |
| 14  | 201-206  | IDVVEM                                             | 705.3491                        | 705.3488    | 0.5            |
| 15  | 207-221  | FDQVIPAADKDIVKV                                    | 1657.9168                       | 1657.9160   | 0.5            |
| 16  | 222-234  | FTKRISKKFNML                                       | 1625.9574                       | 1625.9560   | 0.8            |
| 17  | 235-249  | ETKVTAVEAKEDGIY                                    | 1652.8385                       | 1652.8378   | 0.4            |
| 18  | 250-268  | VTMEGKKAPAEPQRYDAVL                                | 2103.0902                       | 2103.0903   | 0.0            |
| 19  | 269-288  | VAIGRVPNGKNLDAGKAGV<br>E                           | 1965.0878                       | 1965.0876   | 0.1            |
| 20  | 294-310  | FIRVDKQLRTNVPHIFA                                  | 2054.1673                       | 2054.1658   | 0.8            |
| 21  | 311-332  | IGDIVGQPMLAHKGVHEGH<br>VAA                         | 2236.1652                       | 2236.1655   | -0.2           |
| 22  | 333-351  | EVIAGKKHYFDPKVIPSIA                                | 2112.1868                       | 2112.1852   | 0.7            |
| 23  | 352-359  | YTEPEVAW                                           | 994.4518                        | 994.4516    | 0.1            |
| 24  | 400-421  | IFDKESHVIGGAIVGTNGG<br>EL                          | 2269.1957                       | 2269.1935   | 1.0            |
| 25  | 422-427  | LGEIGL                                             | 601.3558                        | 601.3556    | 0.5            |
| 26  | 458-474  | VFEGSITDLPNPKAKKK                                  | 1872.0592                       | 1872.0589   | 0.1            |

SD Table S3. Part 1: Sequence-specific resonance assignments on the E2-didomain from *Escherichia coli* PDHc.

| Backbone chemical shifts of assigned residues of E2 didomain |           |        |       |       |        |
|--------------------------------------------------------------|-----------|--------|-------|-------|--------|
| Residue                                                      | Atom Type |        |       |       |        |
|                                                              | H         | N      | CA    | CB    | C      |
| Met0                                                         | 8.67      | 121.35 | 54.63 | 34.69 | 173.63 |
| Ala1                                                         | 8.29      | 126.50 | 50.53 | 19.43 | 177.04 |
| Ile2                                                         | 9.23      | 122.59 | 59.22 | 41.30 | 174.53 |
| Glu3                                                         | 8.51      | 125.80 | 56.83 | 30.54 | 174.88 |
| Ile4                                                         | 8.47      | 123.76 | 57.71 | 35.46 | 174.79 |
| Lys5                                                         | 8.59      | 127.84 | 53.18 | 35.49 | 175.61 |
| Val6                                                         | 8.48      | 123.12 | 61.43 | 32.16 | -      |
| Pro7                                                         | -         | -      | 62.38 | 32.10 | 172.49 |
| Asp8                                                         | 7.90      | 113.46 | 54.56 | 39.30 | 177.38 |
| Ile9                                                         | 8.17      | 125.68 | 59.91 | 38.25 | 176.71 |
| Gly10                                                        | 8.44      | 112.33 | 44.58 | -     | -      |
| Ala11                                                        | 8.00      | 124.60 | 51.68 | 19.54 | -      |
| Val14                                                        | -         | -      | 58.83 | 35.40 | 173.20 |
| Glu15                                                        | 8.28      | 121.45 | 54.29 | 33.18 | 176.47 |
| Ile16                                                        | 8.79      | 124.31 | 61.80 | 37.42 | 177.10 |
| Thr17                                                        | 9.11      | 123.14 | 62.07 | 68.66 | 175.10 |
| Glu18                                                        | 7.48      | 120.29 | 56.35 | 33.70 | 174.38 |
| Ile19                                                        | 8.88      | 125.12 | 61.80 | 38.50 | 175.85 |
| Leu20                                                        | 8.16      | 126.60 | 55.87 | 41.83 | 176.01 |
| Val21                                                        | 7.02      | 109.95 | 58.14 | 35.55 | 173.04 |
| Lys22                                                        | 8.55      | 119.50 | 53.41 | 35.40 | 175.93 |
| Val23                                                        | 8.31      | 120.25 | 65.54 | 31.10 | 177.25 |
| Gly24                                                        | 9.15      | 117.41 | 44.28 | -     | 174.29 |
| Asp25                                                        | 8.02      | 122.36 | 54.93 | 40.33 | 175.14 |
| Lys26                                                        | 8.37      | 122.80 | 55.53 | 32.07 | 175.76 |
| Val27                                                        | 8.91      | 125.85 | 59.61 | 33.97 | -      |
| Ser32                                                        | -         | -      | 59.89 | 63.06 | 173.50 |
| Leu33                                                        | 9.06      | 121.54 | 55.86 | 45.42 | 177.18 |
| Ile34                                                        | 6.93      | 108.06 | 58.00 | 43.07 | 172.88 |
| Thr35                                                        | 8.78      | 119.93 | 61.33 | 69.10 | 174.45 |
| Val36                                                        | 9.01      | 117.74 | 57.11 | 34.63 | 174.13 |
| Glu37                                                        | 9.02      | 121.20 | 55.77 | 33.66 | -      |
| Asp39                                                        | -         | -      | 56.23 | 40.44 | 176.74 |
| Lys40                                                        | 8.42      | 116.25 | 55.85 | 32.88 | 175.63 |
| Ala41                                                        | 7.47      | 121.53 | 51.74 | 21.43 | 175.95 |
| Ser42                                                        | 8.23      | 116.10 | 57.08 | 64.59 | 173.74 |
| Met43                                                        | 8.89      | 121.80 | 54.87 | 35.86 | 173.71 |
| Glu44                                                        | 8.44      | 121.44 | 54.41 | 30.58 | 176.34 |
| Val45                                                        | 8.32      | 124.04 | 59.11 | 33.24 | -      |
| Pro46                                                        | -         | -      | 60.84 | 32.60 | 176.31 |

SD Table S3. Part 2: Sequence-specific resonance assignments on the E2-didomain from *Escherichia coli* PDHc.

| Backbone chemical shifts of assigned residues of E2 didomain |           |        |       |       |        |
|--------------------------------------------------------------|-----------|--------|-------|-------|--------|
| Residue                                                      | Atom Type |        |       |       |        |
|                                                              | H         | N      | CA    | CB    | C      |
| Ala47                                                        | 8.69      | 123.37 | 49.59 | 17.69 | -      |
| Pro48                                                        | -         | -      | 63.35 | 31.05 | 174.75 |
| Phe49                                                        | 6.86      | 113.12 | 53.97 | 40.56 | 175.22 |
| Ala50                                                        | 8.42      | 119.83 | 51.46 | 20.23 | 178.04 |
| Gly51                                                        | 7.96      | 105.71 | 45.61 | -     | 169.95 |
| Val52                                                        | 8.05      | 119.69 | 59.58 | 34.41 | 176.48 |
| Val53                                                        | 8.42      | 126.39 | 64.42 | 31.04 | 175.39 |
| Lys54                                                        | 9.26      | 133.47 | 56.59 | 34.71 | 175.65 |
| Glu55                                                        | 7.58      | 115.41 | 55.76 | 34.10 | 174.68 |
| Leu56                                                        | 9.15      | 127.53 | 54.29 | 43.69 | 176.55 |
| Lys57                                                        | 7.89      | 118.85 | 53.67 | 31.79 | 174.53 |
| Val58                                                        | 6.89      | 109.37 | 58.21 | 36.80 | 173.01 |
| Asn59                                                        | 8.70      | 118.47 | 51.17 | 42.46 | 174.92 |
| Val60                                                        | 8.61      | 121.75 | 65.71 | 31.17 | 177.03 |
| Gly61                                                        | 8.96      | 118.04 | 44.31 | 42.11 | 174.26 |
| Asp62                                                        | 7.80      | 121.71 | 54.89 | 40.97 | -      |
| Lys63                                                        | -         | -      | 53.98 | 32.80 | 177.36 |
| Val64                                                        | 8.99      | 115.36 | 58.68 | 36.39 | 172.34 |
| Lys65                                                        | 8.30      | 117.19 | 53.71 | 36.87 | 175.31 |
| Thr66                                                        | 8.82      | 119.07 | 65.23 | 69.85 | 175.78 |
| Gly67                                                        | 8.78      | 117.12 | 45.19 | -     | 174.53 |
| Ser68                                                        | 8.53      | 119.38 | 60.86 | 62.75 | 173.59 |
| Leu69                                                        | 8.67      | 126.69 | 55.69 | 42.00 | 176.16 |
| Ile70                                                        | 8.73      | 117.42 | 61.47 | 40.56 | 175.85 |
| Met71                                                        | 7.67      | 115.83 | 54.94 | 36.33 | 171.33 |
| Ile72                                                        | 8.70      | 119.26 | 58.68 | 39.30 | 176.17 |
| Phe73                                                        | 9.37      | 129.52 | 53.04 | 41.87 | 175.38 |
| Glu74                                                        | 9.35      | 121.85 | 55.43 | 32.07 | -      |
| Val75                                                        | 8.87      | 123.55 | 59.88 | 34.61 | 174.96 |
| Glu76                                                        | 8.49      | 124.39 | 56.16 | 30.29 | 176.63 |
| Gly77                                                        | 8.18      | 111.88 | 44.66 | -     | 172.81 |
| Ala78                                                        | 8.00      | 123.98 | 51.48 | 19.56 | 176.94 |
| Ala79                                                        | 8.19      | 125.64 | 50.19 | 18.03 | -      |
| Pro92                                                        | -         | -      | 60.66 | 32.69 | 176.24 |
| Ala93                                                        | 8.68      | 123.24 | 49.31 | 17.64 | -      |
| Lys112                                                       | -         | -      | 55.96 | 32.96 | 175.78 |
| Ser113                                                       | 7.96      | 123.99 | 59.59 | 64.41 | -      |
| Pro179                                                       | -         | -      | 63.28 | 31.81 | -      |
| Gly180                                                       | 7.88      | 116.19 | 45.86 | -     | -      |

SD Table S4. Co-ordinates of the model of the *E.coli* E3-PSBD Interface. Please see text for details.

```

REMARK      A MODEL OF THE ESCHERICHIA COLI E3-PSBD INTERFACE PREPARED
REMARK      ON THE BASIS OF THE CRYSTAL STRUCTURE OF THE E3b-PSBDp
REMARK      COMPLEX FROM THERMUS THERMOPHILUS (PDB CODE 2EQ8) REPORTED
REMARK      BY NAKAI ET AL. (2008) J. BIOCHEM. 143, 747-758 AND KNOWN
REMARK      SEQUENCES OF THE E. COLI E3 AND PSBD.
REMARK
JRNL        AUTH      K.CHANDRASEKHAR,J.WANG,P.ARJUNAN,M.SAX,Y-H.PARK,
JRNL        AUTH      N.S.NEMERIA,S.KUMARAN,J.SONG,F.JORDAN,W.FUREY
JRNL        TITL      INSIGHT TO THE INTERACTION OF THE E2 CORE WITH THE
JRNL        TITL 2    PERIPHERAL COMPONENTS IN THE ESCHERICHIA COLI
JRNL        TITL 3    PYRUVATE DEHYDROGENASE COMPLEX VIA MULTIFACETED
JRNL        TITL 4    STRUCTURAL APPROACHES.
JRNL        REF       SUBMITTED TO J. BIOL. CHEM.
JRNL        REFN      ASTM
CRYST1      1.000      1.000      1.000  90.00  90.00  90.00 P 1          1
ORIGX1      1.000000   0.000000   0.000000           0.00000
ORIGX2      0.000000   1.000000   0.000000           0.00000
ORIGX3      0.000000   0.000000   1.000000           0.00000
SCALE1      1.000000   0.000000   0.000000           0.00000
SCALE2      0.000000   0.000000   0.000000           0.00000
SCALE3      0.000000   0.000000   0.000000           0.00000
ATOM        1  N      ILE A 335      47.640   4.732   31.309   1.00  20.00
ATOM        2  CA     ILE A 335      47.312   5.943   30.566   1.00  20.00
ATOM        3  C      ILE A 335      48.602   6.508   29.983   1.00  20.00
ATOM        4  O      ILE A 335      48.587   7.194   28.958   1.00  20.00
ATOM        5  CB     ILE A 335      46.615   6.981   31.466   1.00  20.00
ATOM        6  CG1    ILE A 335      47.544   7.409   32.604   1.00  20.00
ATOM        7  CG2    ILE A 335      45.314   6.421   32.017   1.00  20.00
ATOM        8  CD1    ILE A 335      47.171   8.734   33.230   1.00  20.00
ATOM        9  N      ALA A 336      49.716   6.215   30.649   1.00  20.00
ATOM       10  CA     ALA A 336      51.021   6.697   30.219   1.00  20.00
ATOM       11  C      ALA A 336      51.658   5.797   29.162   1.00  20.00
ATOM       12  O      ALA A 336      52.803   6.016   28.772   1.00  20.00
ATOM       13  CB     ALA A 336      51.949   6.833   31.424   1.00  20.00
ATOM       14  N      GLY A 337      50.922   4.784   28.710   1.00  20.00
ATOM       15  CA     GLY A 337      51.440   3.894   27.684   1.00  20.00
ATOM       16  C      GLY A 337      52.058   2.589   28.155   1.00  20.00
ATOM       17  O      GLY A 337      52.473   1.769   27.332   1.00  20.00
ATOM       18  N      LYS A 338      52.131   2.387   29.468   1.00  20.00
ATOM       19  CA     LYS A 338      52.703   1.156   30.000   1.00  20.00
ATOM       20  C      LYS A 338      51.659   0.051   29.937   1.00  20.00
ATOM       21  O      LYS A 338      50.581   0.239   29.377   1.00  20.00
ATOM       22  CB     LYS A 338      53.156   1.356   31.449   1.00  20.00
ATOM       23  CG     LYS A 338      54.370   2.256   31.617   1.00  20.00
ATOM       24  CD     LYS A 338      54.755   2.368   33.086   1.00  20.00
ATOM       25  CE     LYS A 338      56.084   3.082   33.270   1.00  20.00
ATOM       26  NZ     LYS A 338      57.210   2.318   32.656   1.00  20.00
ATOM       27  N      LYS A 339      51.982  -1.108   30.494   1.00  20.00
ATOM       28  CA     LYS A 339      51.043  -2.218   30.506   1.00  20.00
ATOM       29  C      LYS A 339      51.030  -2.842   31.894   1.00  20.00
ATOM       30  O      LYS A 339      51.709  -3.839   32.148   1.00  20.00

```

|      |    |     |     |   |     |        |         |        |      |       |
|------|----|-----|-----|---|-----|--------|---------|--------|------|-------|
| ATOM | 31 | CB  | LYS | A | 339 | 51.411 | -3.260  | 29.449 | 1.00 | 20.00 |
| ATOM | 32 | CG  | LYS | A | 339 | 50.432 | -4.420  | 29.352 | 1.00 | 20.00 |
| ATOM | 33 | CD  | LYS | A | 339 | 50.830 | -5.390  | 28.253 | 1.00 | 20.00 |
| ATOM | 34 | CE  | LYS | A | 339 | 49.865 | -6.561  | 28.172 | 1.00 | 20.00 |
| ATOM | 35 | NZ  | LYS | A | 339 | 50.244 | -7.520  | 27.098 | 1.00 | 20.00 |
| ATOM | 36 | N   | HIS | A | 340 | 50.261 | -2.240  | 32.795 | 1.00 | 20.00 |
| ATOM | 37 | CA  | HIS | A | 340 | 50.156 | -2.738  | 34.160 | 1.00 | 20.00 |
| ATOM | 38 | C   | HIS | A | 340 | 48.797 | -3.380  | 34.391 | 1.00 | 20.00 |
| ATOM | 39 | O   | HIS | A | 340 | 47.814 | -3.031  | 33.734 | 1.00 | 20.00 |
| ATOM | 40 | CB  | HIS | A | 340 | 50.387 | -1.609  | 35.166 | 1.00 | 20.00 |
| ATOM | 41 | CG  | HIS | A | 340 | 51.734 | -0.967  | 35.055 | 1.00 | 20.00 |
| ATOM | 42 | ND1 | HIS | A | 340 | 52.901 | -1.618  | 35.397 | 1.00 | 20.00 |
| ATOM | 43 | CD2 | HIS | A | 340 | 52.102 | 0.268   | 34.640 | 1.00 | 20.00 |
| ATOM | 44 | CE1 | HIS | A | 340 | 53.928 | -0.811  | 35.198 | 1.00 | 20.00 |
| ATOM | 45 | NE2 | HIS | A | 340 | 53.472 | 0.339   | 34.739 | 1.00 | 20.00 |
| ATOM | 46 | N   | TYR | A | 341 | 48.744 | -4.321  | 35.328 | 1.00 | 20.00 |
| ATOM | 47 | CA  | TYR | A | 341 | 47.503 | -5.015  | 35.649 | 1.00 | 20.00 |
| ATOM | 48 | C   | TYR | A | 341 | 47.386 | -5.269  | 37.148 | 1.00 | 20.00 |
| ATOM | 49 | O   | TYR | A | 341 | 48.381 | -5.533  | 37.822 | 1.00 | 20.00 |
| ATOM | 50 | CB  | TYR | A | 341 | 47.414 | -6.336  | 34.883 | 1.00 | 20.00 |
| ATOM | 51 | CG  | TYR | A | 341 | 48.468 | -7.346  | 35.278 | 1.00 | 20.00 |
| ATOM | 52 | CD1 | TYR | A | 341 | 49.625 | -6.949  | 35.936 | 1.00 | 20.00 |
| ATOM | 53 | CD2 | TYR | A | 341 | 48.306 | -8.695  | 34.995 | 1.00 | 20.00 |
| ATOM | 54 | CE1 | TYR | A | 341 | 50.590 | -7.869  | 36.300 | 1.00 | 20.00 |
| ATOM | 55 | CE2 | TYR | A | 341 | 49.266 | -9.622  | 35.354 | 1.00 | 20.00 |
| ATOM | 56 | CZ  | TYR | A | 341 | 50.406 | -9.203  | 36.007 | 1.00 | 20.00 |
| ATOM | 57 | OH  | TYR | A | 341 | 51.365 | -10.122 | 36.367 | 1.00 | 20.00 |
| ATOM | 58 | N   | PHE | A | 342 | 46.163 | -5.189  | 37.663 | 1.00 | 20.00 |
| ATOM | 59 | CA  | PHE | A | 342 | 45.914 | -5.410  | 39.082 | 1.00 | 20.00 |
| ATOM | 60 | C   | PHE | A | 342 | 45.696 | -6.890  | 39.381 | 1.00 | 20.00 |
| ATOM | 61 | O   | PHE | A | 342 | 44.616 | -7.429  | 39.141 | 1.00 | 20.00 |
| ATOM | 62 | CB  | PHE | A | 342 | 44.704 | -4.596  | 39.547 | 1.00 | 20.00 |
| ATOM | 63 | CG  | PHE | A | 342 | 44.557 | -4.528  | 41.040 | 1.00 | 20.00 |
| ATOM | 64 | CD1 | PHE | A | 342 | 44.156 | -5.640  | 41.761 | 1.00 | 20.00 |
| ATOM | 65 | CD2 | PHE | A | 342 | 44.819 | -3.352  | 41.722 | 1.00 | 20.00 |
| ATOM | 66 | CE1 | PHE | A | 342 | 44.019 | -5.581  | 43.135 | 1.00 | 20.00 |
| ATOM | 67 | CE2 | PHE | A | 342 | 44.684 | -3.285  | 43.096 | 1.00 | 20.00 |
| ATOM | 68 | CZ  | PHE | A | 342 | 44.284 | -4.401  | 43.804 | 1.00 | 20.00 |
| ATOM | 69 | N   | ASP | A | 343 | 46.729 | -7.541  | 39.905 | 1.00 | 20.00 |
| ATOM | 70 | CA  | ASP | A | 343 | 46.653 | -8.958  | 40.238 | 1.00 | 20.00 |
| ATOM | 71 | C   | ASP | A | 343 | 47.205 | -9.230  | 41.633 | 1.00 | 20.00 |
| ATOM | 72 | O   | ASP | A | 343 | 47.646 | -10.340 | 41.931 | 1.00 | 20.00 |
| ATOM | 73 | CB  | ASP | A | 343 | 47.408 | -9.793  | 39.202 | 1.00 | 20.00 |
| ATOM | 74 | CG  | ASP | A | 343 | 48.894 | -9.490  | 39.181 | 1.00 | 20.00 |
| ATOM | 75 | OD1 | ASP | A | 343 | 49.368 | -8.769  | 40.083 | 1.00 | 20.00 |
| ATOM | 76 | OD2 | ASP | A | 343 | 49.587 | -9.973  | 38.261 | 1.00 | 20.00 |
| ATOM | 77 | N   | PRO | A | 344 | 47.178 | -8.210  | 42.485 | 1.00 | 20.00 |
| ATOM | 78 | CA  | PRO | A | 344 | 47.677 | -8.340  | 43.858 | 1.00 | 20.00 |
| ATOM | 79 | C   | PRO | A | 344 | 46.759 | -9.206  | 44.714 | 1.00 | 20.00 |
| ATOM | 80 | O   | PRO | A | 344 | 45.553 | -8.962  | 44.730 | 1.00 | 20.00 |
| ATOM | 81 | CB  | PRO | A | 344 | 47.666 | -6.898  | 44.368 | 1.00 | 20.00 |
| ATOM | 82 | CG  | PRO | A | 344 | 47.837 | -6.069  | 43.141 | 1.00 | 20.00 |
| ATOM | 83 | CD  | PRO | A | 344 | 47.110 | -6.804  | 42.050 | 1.00 | 20.00 |

|      |     |     |     |   |     |        |         |        |      |       |
|------|-----|-----|-----|---|-----|--------|---------|--------|------|-------|
| ATOM | 148 | N   | GLY | A | 426 | 50.786 | -10.500 | 53.405 | 1.00 | 20.00 |
| ATOM | 149 | CA  | GLY | A | 426 | 50.534 | -10.084 | 52.023 | 1.00 | 20.00 |
| ATOM | 150 | C   | GLY | A | 426 | 51.766 | -10.354 | 51.169 | 1.00 | 20.00 |
| ATOM | 151 | O   | GLY | A | 426 | 51.666 | -10.878 | 50.052 | 1.00 | 20.00 |
| ATOM | 152 | N   | LEU | A | 427 | 52.930 | -9.985  | 51.697 | 1.00 | 20.00 |
| ATOM | 153 | CA  | LEU | A | 427 | 54.183 | -10.199 | 50.988 | 1.00 | 20.00 |
| ATOM | 154 | C   | LEU | A | 427 | 54.413 | -11.691 | 50.795 | 1.00 | 20.00 |
| ATOM | 155 | O   | LEU | A | 427 | 54.804 | -12.134 | 49.716 | 1.00 | 20.00 |
| ATOM | 156 | CB  | LEU | A | 427 | 55.359 | -9.595  | 51.765 | 1.00 | 20.00 |
| ATOM | 157 | CG  | LEU | A | 427 | 56.721 | -9.894  | 51.127 | 1.00 | 20.00 |
| ATOM | 158 | CD1 | LEU | A | 427 | 56.747 | -9.334  | 49.720 | 1.00 | 20.00 |
| ATOM | 159 | CD2 | LEU | A | 427 | 57.842 | -9.298  | 51.963 | 1.00 | 20.00 |
| ATOM | 160 | N   | ALA | A | 428 | 54.175 | -12.461 | 51.850 | 1.00 | 20.00 |
| ATOM | 161 | CA  | ALA | A | 428 | 54.348 | -13.908 | 51.799 | 1.00 | 20.00 |
| ATOM | 162 | C   | ALA | A | 428 | 53.541 | -14.463 | 50.623 | 1.00 | 20.00 |
| ATOM | 163 | O   | ALA | A | 428 | 54.060 | -15.227 | 49.811 | 1.00 | 20.00 |
| ATOM | 164 | CB  | ALA | A | 428 | 53.885 | -14.540 | 53.117 | 1.00 | 20.00 |
| ATOM | 165 | N   | ILE | A | 429 | 52.275 | -14.069 | 50.524 | 1.00 | 20.00 |
| ATOM | 166 | CA  | ILE | A | 429 | 51.435 | -14.543 | 49.425 | 1.00 | 20.00 |
| ATOM | 167 | C   | ILE | A | 429 | 51.955 | -14.067 | 48.068 | 1.00 | 20.00 |
| ATOM | 168 | O   | ILE | A | 429 | 52.018 | -14.846 | 47.117 | 1.00 | 20.00 |
| ATOM | 169 | CB  | ILE | A | 429 | 49.980 | -14.077 | 49.622 | 1.00 | 20.00 |
| ATOM | 170 | CG1 | ILE | A | 429 | 49.371 | -14.739 | 50.860 | 1.00 | 20.00 |
| ATOM | 171 | CG2 | ILE | A | 429 | 49.150 | -14.384 | 48.386 | 1.00 | 20.00 |
| ATOM | 172 | CD1 | ILE | A | 429 | 48.045 | -14.145 | 51.280 | 1.00 | 20.00 |
| ATOM | 173 | N   | GLU | A | 430 | 52.334 | -12.794 | 47.978 | 1.00 | 20.00 |
| ATOM | 174 | CA  | GLU | A | 430 | 52.845 | -12.255 | 46.724 | 1.00 | 20.00 |
| ATOM | 175 | C   | GLU | A | 430 | 54.085 | -13.008 | 46.253 | 1.00 | 20.00 |
| ATOM | 176 | O   | GLU | A | 430 | 54.287 | -13.189 | 45.053 | 1.00 | 20.00 |
| ATOM | 177 | CB  | GLU | A | 430 | 53.174 | -10.768 | 46.869 | 1.00 | 20.00 |
| ATOM | 178 | CG  | GLU | A | 430 | 51.960 | -9.876  | 47.072 | 1.00 | 20.00 |
| ATOM | 179 | CD  | GLU | A | 430 | 51.039 | -9.841  | 45.859 | 1.00 | 20.00 |
| ATOM | 180 | OE1 | GLU | A | 430 | 49.983 | -9.176  | 45.934 | 1.00 | 20.00 |
| ATOM | 181 | OE2 | GLU | A | 430 | 51.370 | -10.474 | 44.834 | 1.00 | 20.00 |
| ATOM | 182 | N   | MET | A | 431 | 54.910 | -13.445 | 47.203 | 1.00 | 20.00 |
| ATOM | 183 | CA  | MET | A | 431 | 56.135 | -14.173 | 46.883 | 1.00 | 20.00 |
| ATOM | 184 | C   | MET | A | 431 | 55.908 | -15.676 | 46.758 | 1.00 | 20.00 |
| ATOM | 185 | O   | MET | A | 431 | 56.861 | -16.431 | 46.581 | 1.00 | 20.00 |
| ATOM | 186 | CB  | MET | A | 431 | 57.200 | -13.925 | 47.957 | 1.00 | 20.00 |
| ATOM | 187 | CG  | MET | A | 431 | 57.610 | -12.472 | 48.133 | 1.00 | 20.00 |
| ATOM | 188 | SD  | MET | A | 431 | 58.261 | -11.730 | 46.625 | 1.00 | 20.00 |
| ATOM | 189 | CE  | MET | A | 431 | 59.744 | -12.682 | 46.390 | 1.00 | 20.00 |
| ATOM | 190 | N   | GLY | A | 432 | 54.657 | -16.112 | 46.860 | 1.00 | 20.00 |
| ATOM | 191 | CA  | GLY | A | 432 | 54.364 | -17.533 | 46.753 | 1.00 | 20.00 |
| ATOM | 192 | C   | GLY | A | 432 | 55.033 | -18.362 | 47.836 | 1.00 | 20.00 |
| ATOM | 193 | O   | GLY | A | 432 | 55.539 | -19.454 | 47.582 | 1.00 | 20.00 |
| ATOM | 194 | N   | CYS | A | 433 | 55.031 | -17.846 | 49.058 | 1.00 | 20.00 |
| ATOM | 195 | CA  | CYS | A | 433 | 55.650 | -18.549 | 50.171 | 1.00 | 20.00 |
| ATOM | 196 | C   | CYS | A | 433 | 54.875 | -19.787 | 50.606 | 1.00 | 20.00 |
| ATOM | 197 | O   | CYS | A | 433 | 53.652 | -19.860 | 50.456 | 1.00 | 20.00 |
| ATOM | 198 | CB  | CYS | A | 433 | 55.812 | -17.602 | 51.361 | 1.00 | 20.00 |
| ATOM | 199 | SG  | CYS | A | 433 | 56.932 | -16.215 | 51.065 | 1.00 | 20.00 |
| TER  | 200 |     | CYS | A | 433 |        |         |        |      |       |

|      |     |     |     |   |     |        |         |        |      |       |
|------|-----|-----|-----|---|-----|--------|---------|--------|------|-------|
| ATOM | 309 | N   | ASP | B | 437 | 59.321 | -6.030  | 44.234 | 1.00 | 20.00 |
| ATOM | 310 | CA  | ASP | B | 437 | 58.404 | -6.965  | 44.889 | 1.00 | 20.00 |
| ATOM | 311 | C   | ASP | B | 437 | 57.779 | -6.289  | 46.106 | 1.00 | 20.00 |
| ATOM | 312 | O   | ASP | B | 437 | 56.579 | -6.412  | 46.363 | 1.00 | 20.00 |
| ATOM | 313 | CB  | ASP | B | 437 | 59.140 | -8.222  | 45.365 | 1.00 | 20.00 |
| ATOM | 314 | CG  | ASP | B | 437 | 59.551 | -9.127  | 44.223 | 1.00 | 20.00 |
| ATOM | 315 | OD1 | ASP | B | 437 | 58.796 | -9.197  | 43.233 | 1.00 | 20.00 |
| ATOM | 316 | OD2 | ASP | B | 437 | 60.612 | -9.776  | 44.326 | 1.00 | 20.00 |
| ATOM | 317 | N   | ILE | B | 438 | 58.616 | -5.587  | 46.862 | 1.00 | 20.00 |
| ATOM | 318 | CA  | ILE | B | 438 | 58.172 | -4.894  | 48.062 | 1.00 | 20.00 |
| ATOM | 319 | C   | ILE | B | 438 | 57.247 | -3.730  | 47.713 | 1.00 | 20.00 |
| ATOM | 320 | O   | ILE | B | 438 | 56.195 | -3.546  | 48.334 | 1.00 | 20.00 |
| ATOM | 321 | CB  | ILE | B | 438 | 59.380 | -4.386  | 48.872 | 1.00 | 20.00 |
| ATOM | 322 | CG1 | ILE | B | 438 | 60.189 | -5.564  | 49.419 | 1.00 | 20.00 |
| ATOM | 323 | CG2 | ILE | B | 438 | 58.920 | -3.479  | 50.003 | 1.00 | 20.00 |
| ATOM | 324 | CD1 | ILE | B | 438 | 61.528 | -5.167  | 49.999 | 1.00 | 20.00 |
| ATOM | 325 | N   | ALA | B | 439 | 57.634 | -2.949  | 46.711 | 1.00 | 20.00 |
| ATOM | 326 | CA  | ALA | B | 439 | 56.828 | -1.813  | 46.283 | 1.00 | 20.00 |
| ATOM | 327 | C   | ALA | B | 439 | 55.480 | -2.270  | 45.731 | 1.00 | 20.00 |
| ATOM | 328 | O   | ALA | B | 439 | 54.477 | -1.567  | 45.878 | 1.00 | 20.00 |
| ATOM | 329 | CB  | ALA | B | 439 | 57.581 | -1.005  | 45.213 | 1.00 | 20.00 |
| ATOM | 330 | N   | LEU | B | 440 | 55.454 | -3.442  | 45.097 | 1.00 | 20.00 |
| ATOM | 331 | CA  | LEU | B | 440 | 54.219 | -3.960  | 44.513 | 1.00 | 20.00 |
| ATOM | 332 | C   | LEU | B | 440 | 53.337 | -4.761  | 45.461 | 1.00 | 20.00 |
| ATOM | 333 | O   | LEU | B | 440 | 52.260 | -5.211  | 45.079 | 1.00 | 20.00 |
| ATOM | 334 | CB  | LEU | B | 440 | 54.518 | -4.797  | 43.260 | 1.00 | 20.00 |
| ATOM | 335 | CG  | LEU | B | 440 | 55.087 | -4.008  | 42.069 | 1.00 | 20.00 |
| ATOM | 336 | CD1 | LEU | B | 440 | 55.141 | -4.920  | 40.842 | 1.00 | 20.00 |
| ATOM | 337 | CD2 | LEU | B | 440 | 54.215 | -2.789  | 41.781 | 1.00 | 20.00 |
| ATOM | 338 | N   | THR | B | 441 | 53.788 | -4.966  | 46.689 | 1.00 | 20.00 |
| ATOM | 339 | CA  | THR | B | 441 | 52.954 | -5.678  | 47.644 | 1.00 | 20.00 |
| ATOM | 340 | C   | THR | B | 441 | 52.000 | -4.611  | 48.172 | 1.00 | 20.00 |
| ATOM | 341 | O   | THR | B | 441 | 52.422 | -3.501  | 48.510 | 1.00 | 20.00 |
| ATOM | 342 | CB  | THR | B | 441 | 53.791 | -6.287  | 48.784 | 1.00 | 20.00 |
| ATOM | 343 | OG1 | THR | B | 441 | 54.604 | -7.338  | 48.250 | 1.00 | 20.00 |
| ATOM | 344 | CG2 | THR | B | 441 | 52.885 | -6.867  | 49.877 | 1.00 | 20.00 |
| ATOM | 345 | N   | ILE | B | 442 | 50.713 | -4.931  | 48.217 | 1.00 | 20.00 |
| ATOM | 346 | CA  | ILE | B | 442 | 49.731 | -3.966  | 48.681 | 1.00 | 20.00 |
| ATOM | 347 | C   | ILE | B | 442 | 49.619 | -3.921  | 50.197 | 1.00 | 20.00 |
| ATOM | 348 | O   | ILE | B | 442 | 48.944 | -4.758  | 50.806 | 1.00 | 20.00 |
| ATOM | 349 | CB  | ILE | B | 442 | 48.352 | -4.278  | 48.069 | 1.00 | 20.00 |
| ATOM | 350 | CG1 | ILE | B | 442 | 48.386 | -4.086  | 46.552 | 1.00 | 20.00 |
| ATOM | 351 | CG2 | ILE | B | 442 | 47.279 | -3.403  | 48.698 | 1.00 | 20.00 |
| ATOM | 352 | CD1 | ILE | B | 442 | 47.162 | -4.619  | 45.842 | 1.00 | 20.00 |
| TER  | 353 |     | ILE | B | 442 |        |         |        |      |       |
| ATOM | 354 | N   | HIS | C | 123 | 52.737 | -19.005 | 43.152 | 1.00 | 20.00 |
| ATOM | 355 | CA  | HIS | C | 123 | 52.730 | -18.048 | 42.063 | 1.00 | 20.00 |
| ATOM | 356 | C   | HIS | C | 123 | 54.045 | -17.335 | 41.959 | 1.00 | 20.00 |
| ATOM | 357 | O   | HIS | C | 123 | 54.963 | -17.562 | 42.776 | 1.00 | 20.00 |
| ATOM | 358 | CB  | HIS | C | 123 | 51.600 | -17.041 | 42.244 | 1.00 | 20.00 |
| ATOM | 359 | CG  | HIS | C | 123 | 50.225 | -17.665 | 42.259 | 1.00 | 20.00 |
| ATOM | 360 | ND1 | HIS | C | 123 | 49.662 | -18.203 | 41.162 | 1.00 | 20.00 |
| ATOM | 361 | CD2 | HIS | C | 123 | 49.302 | -17.821 | 43.291 | 1.00 | 20.00 |



|      |     |     |     |   |     |        |         |        |      |       |
|------|-----|-----|-----|---|-----|--------|---------|--------|------|-------|
| ATOM | 362 | CE1 | HIS | C | 123 | 48.442 | -18.680 | 41.472 | 1.00 | 20.00 |
| ATOM | 363 | NE2 | HIS | C | 123 | 48.223 | -18.445 | 42.776 | 1.00 | 20.00 |
| ATOM | 364 | N   | ALA | C | 124 | 54.163 | -16.465 | 40.961 | 1.00 | 20.00 |
| ATOM | 365 | CA  | ALA | C | 124 | 55.391 | -15.708 | 40.746 | 1.00 | 20.00 |
| ATOM | 366 | C   | ALA | C | 124 | 55.346 | -14.366 | 41.470 | 1.00 | 20.00 |
| ATOM | 367 | O   | ALA | C | 124 | 54.271 | -13.842 | 41.759 | 1.00 | 20.00 |
| ATOM | 368 | CB  | ALA | C | 124 | 55.633 | -15.503 | 39.258 | 1.00 | 20.00 |
| ATOM | 369 | N   | THR | C | 125 | 56.521 | -13.816 | 41.758 | 1.00 | 20.00 |
| ATOM | 370 | CA  | THR | C | 125 | 56.619 | -12.536 | 42.448 | 1.00 | 20.00 |
| ATOM | 371 | C   | THR | C | 125 | 56.072 | -11.403 | 41.586 | 1.00 | 20.00 |
| ATOM | 372 | O   | THR | C | 125 | 56.043 | -11.502 | 40.359 | 1.00 | 20.00 |
| ATOM | 373 | CB  | THR | C | 125 | 58.073 | -12.214 | 42.838 | 1.00 | 20.00 |
| ATOM | 374 | OG1 | THR | C | 125 | 58.899 | -12.226 | 41.667 | 1.00 | 20.00 |
| ATOM | 375 | CG2 | THR | C | 125 | 58.596 | -13.239 | 43.833 | 1.00 | 20.00 |
| ATOM | 376 | N   | PRO | C | 126 | 55.639 | -10.327 | 42.236 | 1.00 | 20.00 |
| ATOM | 377 | CA  | PRO | C | 126 | 55.088 | -9.168  | 41.526 | 1.00 | 20.00 |
| ATOM | 378 | C   | PRO | C | 126 | 56.061 | -8.628  | 40.483 | 1.00 | 20.00 |
| ATOM | 379 | O   | PRO | C | 126 | 55.643 | -8.251  | 39.388 | 1.00 | 20.00 |
| ATOM | 380 | CB  | PRO | C | 126 | 54.892 | -8.141  | 42.643 | 1.00 | 20.00 |
| ATOM | 381 | CG  | PRO | C | 126 | 54.680 | -8.962  | 43.868 | 1.00 | 20.00 |
| ATOM | 382 | CD  | PRO | C | 126 | 55.543 | -10.180 | 43.699 | 1.00 | 20.00 |
| ATOM | 383 | N   | LEU | C | 127 | 57.344 | -8.595  | 40.825 | 1.00 | 20.00 |
| ATOM | 384 | CA  | LEU | C | 127 | 58.370 | -8.114  | 39.908 | 1.00 | 20.00 |
| ATOM | 385 | C   | LEU | C | 127 | 58.434 | -8.987  | 38.660 | 1.00 | 20.00 |
| ATOM | 386 | O   | LEU | C | 127 | 58.502 | -8.481  | 37.539 | 1.00 | 20.00 |
| ATOM | 387 | CB  | LEU | C | 127 | 59.735 | -8.081  | 40.598 | 1.00 | 20.00 |
| ATOM | 388 | CG  | LEU | C | 127 | 60.952 | -7.918  | 39.686 | 1.00 | 20.00 |
| ATOM | 389 | CD1 | LEU | C | 127 | 61.265 | -6.447  | 39.464 | 1.00 | 20.00 |
| ATOM | 390 | CD2 | LEU | C | 127 | 62.157 | -8.647  | 40.262 | 1.00 | 20.00 |
| ATOM | 391 | N   | ILE | C | 128 | 58.410 | -10.300 | 38.862 | 1.00 | 20.00 |
| ATOM | 392 | CA  | ILE | C | 128 | 58.449 | -11.246 | 37.753 | 1.00 | 20.00 |
| ATOM | 393 | C   | ILE | C | 128 | 57.185 | -11.141 | 36.907 | 1.00 | 20.00 |
| ATOM | 394 | O   | ILE | C | 128 | 57.245 | -11.172 | 35.677 | 1.00 | 20.00 |
| ATOM | 395 | CB  | ILE | C | 128 | 58.604 | -12.695 | 38.252 | 1.00 | 20.00 |
| ATOM | 396 | CG1 | ILE | C | 128 | 60.004 | -12.913 | 38.829 | 1.00 | 20.00 |
| ATOM | 397 | CG2 | ILE | C | 128 | 58.328 | -13.678 | 37.125 | 1.00 | 20.00 |
| ATOM | 398 | CD1 | ILE | C | 128 | 60.146 | -14.195 | 39.619 | 1.00 | 20.00 |
| ATOM | 399 | N   | ARG | C | 129 | 56.042 | -11.016 | 37.574 | 1.00 | 20.00 |
| ATOM | 400 | CA  | ARG | C | 129 | 54.764 | -10.888 | 36.885 | 1.00 | 20.00 |
| ATOM | 401 | C   | ARG | C | 129 | 54.712 | -9.595  | 36.079 | 1.00 | 20.00 |
| ATOM | 402 | O   | ARG | C | 129 | 54.182 | -9.564  | 34.969 | 1.00 | 20.00 |
| ATOM | 403 | CB  | ARG | C | 129 | 53.608 | -10.931 | 37.887 | 1.00 | 20.00 |
| ATOM | 404 | CG  | ARG | C | 129 | 53.672 | -12.099 | 38.857 | 1.00 | 20.00 |
| ATOM | 405 | CD  | ARG | C | 129 | 52.316 | -12.368 | 39.488 | 1.00 | 20.00 |
| ATOM | 406 | NE  | ARG | C | 129 | 51.760 | -11.174 | 40.118 | 1.00 | 20.00 |
| ATOM | 407 | CZ  | ARG | C | 129 | 51.870 | -10.892 | 41.412 | 1.00 | 20.00 |
| ATOM | 408 | NH1 | ARG | C | 129 | 52.518 | -11.719 | 42.221 | 1.00 | 20.00 |
| ATOM | 409 | NH2 | ARG | C | 129 | 51.332 | -9.782  | 41.899 | 1.00 | 20.00 |
| ATOM | 410 | N   | ARG | C | 130 | 55.267 | -8.529  | 36.647 | 1.00 | 20.00 |
| ATOM | 411 | CA  | ARG | C | 130 | 55.299 | -7.234  | 35.978 | 1.00 | 20.00 |
| ATOM | 412 | C   | ARG | C | 130 | 56.262 | -7.260  | 34.796 | 1.00 | 20.00 |
| ATOM | 413 | O   | ARG | C | 130 | 55.992 | -6.672  | 33.749 | 1.00 | 20.00 |
| ATOM | 414 | CB  | ARG | C | 130 | 55.701 | -6.133  | 36.961 | 1.00 | 20.00 |

|      |     |     |     |   |     |        |         |        |      |       |
|------|-----|-----|-----|---|-----|--------|---------|--------|------|-------|
| ATOM | 415 | CG  | ARG | C | 130 | 54.721 | -5.935  | 38.106 | 1.00 | 20.00 |
| ATOM | 416 | CD  | ARG | C | 130 | 53.398 | -5.374  | 37.610 | 1.00 | 20.00 |
| ATOM | 417 | NE  | ARG | C | 130 | 52.460 | -5.137  | 38.703 | 1.00 | 20.00 |
| ATOM | 418 | CZ  | ARG | C | 130 | 51.670 | -6.070  | 39.225 | 1.00 | 20.00 |
| ATOM | 419 | NH1 | ARG | C | 130 | 50.847 | -5.765  | 40.219 | 1.00 | 20.00 |
| ATOM | 420 | NH2 | ARG | C | 130 | 51.702 | -7.309  | 38.754 | 1.00 | 20.00 |
| ATOM | 421 | N   | LEU | C | 131 | 57.386 | -7.947  | 34.972 | 1.00 | 20.00 |
| ATOM | 422 | CA  | LEU | C | 131 | 58.384 | -8.066  | 33.916 | 1.00 | 20.00 |
| ATOM | 423 | C   | LEU | C | 131 | 57.824 | -8.840  | 32.728 | 1.00 | 20.00 |
| ATOM | 424 | O   | LEU | C | 131 | 58.077 | -8.494  | 31.574 | 1.00 | 20.00 |
| ATOM | 425 | CB  | LEU | C | 131 | 59.645 | -8.752  | 34.444 | 1.00 | 20.00 |
| ATOM | 426 | CG  | LEU | C | 131 | 60.974 | -8.275  | 33.854 | 1.00 | 20.00 |
| ATOM | 427 | CD1 | LEU | C | 131 | 62.011 | -9.387  | 33.896 | 1.00 | 20.00 |
| ATOM | 428 | CD2 | LEU | C | 131 | 60.780 | -7.771  | 32.432 | 1.00 | 20.00 |
| ATOM | 429 | N   | ALA | C | 132 | 57.060 | -9.888  | 33.019 | 1.00 | 20.00 |
| ATOM | 430 | CA  | ALA | C | 132 | 56.449 | -10.703 | 31.977 | 1.00 | 20.00 |
| ATOM | 431 | C   | ALA | C | 132 | 55.545 | -9.856  | 31.088 | 1.00 | 20.00 |
| ATOM | 432 | O   | ALA | C | 132 | 55.605 | -9.944  | 29.862 | 1.00 | 20.00 |
| ATOM | 433 | CB  | ALA | C | 132 | 55.666 | -11.853 | 32.593 | 1.00 | 20.00 |
| ATOM | 434 | N   | ARG | C | 133 | 54.708 | -9.037  | 31.715 | 1.00 | 20.00 |
| ATOM | 435 | CA  | ARG | C | 133 | 53.787 | -8.175  | 30.983 | 1.00 | 20.00 |
| ATOM | 436 | C   | ARG | C | 133 | 54.540 | -7.140  | 30.154 | 1.00 | 20.00 |
| ATOM | 437 | O   | ARG | C | 133 | 54.039 | -6.664  | 29.135 | 1.00 | 20.00 |
| ATOM | 438 | CB  | ARG | C | 133 | 52.825 | -7.478  | 31.947 | 1.00 | 20.00 |
| ATOM | 439 | CG  | ARG | C | 133 | 51.941 | -8.428  | 32.737 | 1.00 | 20.00 |
| ATOM | 440 | CD  | ARG | C | 133 | 50.885 | -7.672  | 33.527 | 1.00 | 20.00 |
| ATOM | 441 | NE  | ARG | C | 133 | 50.004 | -6.896  | 32.659 | 1.00 | 20.00 |
| ATOM | 442 | CZ  | ARG | C | 133 | 48.904 | -7.378  | 32.088 | 1.00 | 20.00 |
| ATOM | 443 | NH1 | ARG | C | 133 | 48.546 | -8.638  | 32.293 | 1.00 | 20.00 |
| ATOM | 444 | NH2 | ARG | C | 133 | 48.162 | -6.599  | 31.313 | 1.00 | 20.00 |
| ATOM | 445 | N   | GLU | C | 134 | 55.744 | -6.796  | 30.597 | 1.00 | 20.00 |
| ATOM | 446 | CA  | GLU | C | 134 | 56.566 | -5.815  | 29.898 | 1.00 | 20.00 |
| ATOM | 447 | C   | GLU | C | 134 | 57.290 | -6.445  | 28.712 | 1.00 | 20.00 |
| ATOM | 448 | O   | GLU | C | 134 | 57.477 | -5.807  | 27.677 | 1.00 | 20.00 |
| ATOM | 449 | CB  | GLU | C | 134 | 57.578 | -5.184  | 30.856 | 1.00 | 20.00 |
| ATOM | 450 | CG  | GLU | C | 134 | 58.459 | -4.123  | 30.217 | 1.00 | 20.00 |
| ATOM | 451 | CD  | GLU | C | 134 | 59.693 | -3.815  | 31.043 | 1.00 | 20.00 |
| ATOM | 452 | OE1 | GLU | C | 134 | 59.563 | -3.672  | 32.277 | 1.00 | 20.00 |
| ATOM | 453 | OE2 | GLU | C | 134 | 60.792 | -3.716  | 30.458 | 1.00 | 20.00 |
| ATOM | 454 | N   | PHE | C | 135 | 57.694 | -7.701  | 28.872 | 1.00 | 20.00 |
| ATOM | 455 | CA  | PHE | C | 135 | 58.400 | -8.418  | 27.816 | 1.00 | 20.00 |
| ATOM | 456 | C   | PHE | C | 135 | 57.428 | -9.180  | 26.921 | 1.00 | 20.00 |
| ATOM | 457 | O   | PHE | C | 135 | 57.828 | -9.781  | 25.924 | 1.00 | 20.00 |
| ATOM | 458 | CB  | PHE | C | 135 | 59.427 | -9.380  | 28.416 | 1.00 | 20.00 |
| ATOM | 459 | CG  | PHE | C | 135 | 60.580 | -8.692  | 29.091 | 1.00 | 20.00 |
| ATOM | 460 | CD1 | PHE | C | 135 | 60.635 | -7.310  | 29.159 | 1.00 | 20.00 |
| ATOM | 461 | CD2 | PHE | C | 135 | 61.608 | -9.428  | 29.657 | 1.00 | 20.00 |
| ATOM | 462 | CE1 | PHE | C | 135 | 61.693 | -6.674  | 29.779 | 1.00 | 20.00 |
| ATOM | 463 | CE2 | PHE | C | 135 | 62.669 | -8.798  | 30.278 | 1.00 | 20.00 |
| ATOM | 464 | CZ  | PHE | C | 135 | 62.712 | -7.419  | 30.340 | 1.00 | 20.00 |
| ATOM | 465 | N   | GLY | C | 136 | 56.150 | -9.151  | 27.283 | 1.00 | 20.00 |
| ATOM | 466 | CA  | GLY | C | 136 | 55.124 | -9.833  | 26.517 | 1.00 | 20.00 |
| ATOM | 467 | C   | GLY | C | 136 | 55.192 | -11.340 | 26.667 | 1.00 | 20.00 |

|      |     |     |     |   |     |        |         |        |      |       |
|------|-----|-----|-----|---|-----|--------|---------|--------|------|-------|
| ATOM | 468 | O   | GLY | C | 136 | 54.752 | -12.081 | 25.788 | 1.00 | 20.00 |
| ATOM | 469 | N   | VAL | C | 137 | 55.746 | -11.794 | 27.786 | 1.00 | 20.00 |
| ATOM | 470 | CA  | VAL | C | 137 | 55.877 | -13.222 | 28.051 | 1.00 | 20.00 |
| ATOM | 471 | C   | VAL | C | 137 | 54.677 | -13.752 | 28.828 | 1.00 | 20.00 |
| ATOM | 472 | O   | VAL | C | 137 | 54.085 | -13.039 | 29.638 | 1.00 | 20.00 |
| ATOM | 473 | CB  | VAL | C | 137 | 57.164 | -13.534 | 28.838 | 1.00 | 20.00 |
| ATOM | 474 | CG1 | VAL | C | 137 | 57.186 | -14.995 | 29.261 | 1.00 | 20.00 |
| ATOM | 475 | CG2 | VAL | C | 137 | 58.390 | -13.195 | 28.004 | 1.00 | 20.00 |
| ATOM | 476 | N   | ASN | C | 138 | 54.323 | -15.008 | 28.576 | 1.00 | 20.00 |
| ATOM | 477 | CA  | ASN | C | 138 | 53.195 | -15.637 | 29.252 | 1.00 | 20.00 |
| ATOM | 478 | C   | ASN | C | 138 | 53.666 | -16.693 | 30.246 | 1.00 | 20.00 |
| ATOM | 479 | O   | ASN | C | 138 | 53.929 | -17.836 | 29.874 | 1.00 | 20.00 |
| ATOM | 480 | CB  | ASN | C | 138 | 52.230 | -16.252 | 28.237 | 1.00 | 20.00 |
| ATOM | 481 | CG  | ASN | C | 138 | 50.969 | -16.791 | 28.884 | 1.00 | 20.00 |
| ATOM | 482 | OD1 | ASN | C | 138 | 50.937 | -17.051 | 30.087 | 1.00 | 20.00 |
| ATOM | 483 | ND2 | ASN | C | 138 | 49.921 | -16.961 | 28.087 | 1.00 | 20.00 |
| ATOM | 484 | N   | LEU | C | 139 | 53.772 | -16.301 | 31.511 | 1.00 | 20.00 |
| ATOM | 485 | CA  | LEU | C | 139 | 54.213 | -17.211 | 32.561 | 1.00 | 20.00 |
| ATOM | 486 | C   | LEU | C | 139 | 53.430 | -18.519 | 32.524 | 1.00 | 20.00 |
| ATOM | 487 | O   | LEU | C | 139 | 53.953 | -19.578 | 32.871 | 1.00 | 20.00 |
| ATOM | 488 | CB  | LEU | C | 139 | 54.073 | -16.553 | 33.935 | 1.00 | 20.00 |
| ATOM | 489 | CG  | LEU | C | 139 | 54.683 | -15.158 | 34.084 | 1.00 | 20.00 |
| ATOM | 490 | CD1 | LEU | C | 139 | 54.417 | -14.601 | 35.475 | 1.00 | 20.00 |
| ATOM | 491 | CD2 | LEU | C | 139 | 56.175 | -15.189 | 33.791 | 1.00 | 20.00 |
| ATOM | 492 | N   | ALA | C | 140 | 52.172 | -18.437 | 32.101 | 1.00 | 20.00 |
| ATOM | 493 | CA  | ALA | C | 140 | 51.314 | -19.613 | 32.019 | 1.00 | 20.00 |
| ATOM | 494 | C   | ALA | C | 140 | 51.843 | -20.612 | 30.995 | 1.00 | 20.00 |
| ATOM | 495 | O   | ALA | C | 140 | 51.378 | -21.750 | 30.925 | 1.00 | 20.00 |
| ATOM | 496 | CB  | ALA | C | 140 | 49.889 | -19.206 | 31.678 | 1.00 | 20.00 |
| ATOM | 497 | N   | LYS | C | 141 | 52.819 | -20.179 | 30.203 | 1.00 | 20.00 |
| ATOM | 498 | CA  | LYS | C | 141 | 53.413 | -21.034 | 29.182 | 1.00 | 20.00 |
| ATOM | 499 | C   | LYS | C | 141 | 54.925 | -21.132 | 29.358 | 1.00 | 20.00 |
| ATOM | 500 | O   | LYS | C | 141 | 55.674 | -21.134 | 28.381 | 1.00 | 20.00 |
| ATOM | 501 | CB  | LYS | C | 141 | 53.079 | -20.512 | 27.784 | 1.00 | 20.00 |
| ATOM | 502 | CG  | LYS | C | 141 | 51.607 | -20.195 | 27.575 | 1.00 | 20.00 |
| ATOM | 503 | CD  | LYS | C | 141 | 51.375 | -19.504 | 26.241 | 1.00 | 20.00 |
| ATOM | 504 | CE  | LYS | C | 141 | 49.906 | -19.533 | 25.853 | 1.00 | 20.00 |
| ATOM | 505 | NZ  | LYS | C | 141 | 49.561 | -20.755 | 25.075 | 1.00 | 20.00 |
| ATOM | 506 | N   | VAL | C | 142 | 55.367 | -21.213 | 30.609 | 1.00 | 20.00 |
| ATOM | 507 | CA  | VAL | C | 142 | 56.789 | -21.310 | 30.914 | 1.00 | 20.00 |
| ATOM | 508 | C   | VAL | C | 142 | 57.034 | -22.212 | 32.120 | 1.00 | 20.00 |
| ATOM | 509 | O   | VAL | C | 142 | 56.189 | -22.321 | 33.007 | 1.00 | 20.00 |
| ATOM | 510 | CB  | VAL | C | 142 | 57.404 | -19.925 | 31.188 | 1.00 | 20.00 |
| ATOM | 511 | CG1 | VAL | C | 142 | 58.775 | -20.071 | 31.829 | 1.00 | 20.00 |
| ATOM | 512 | CG2 | VAL | C | 142 | 57.492 | -19.120 | 29.900 | 1.00 | 20.00 |
| ATOM | 513 | N   | LYS | C | 143 | 58.197 | -22.855 | 32.144 | 1.00 | 20.00 |
| ATOM | 514 | CA  | LYS | C | 143 | 58.557 | -23.747 | 33.240 | 1.00 | 20.00 |
| ATOM | 515 | C   | LYS | C | 143 | 59.695 | -23.165 | 34.073 | 1.00 | 20.00 |
| ATOM | 516 | O   | LYS | C | 143 | 60.837 | -23.098 | 33.619 | 1.00 | 20.00 |
| ATOM | 517 | CB  | LYS | C | 143 | 58.948 | -25.125 | 32.704 | 1.00 | 20.00 |
| ATOM | 518 | CG  | LYS | C | 143 | 59.270 | -26.144 | 33.785 | 1.00 | 20.00 |
| ATOM | 519 | CD  | LYS | C | 143 | 58.029 | -26.517 | 34.579 | 1.00 | 20.00 |
| ATOM | 520 | CE  | LYS | C | 143 | 58.352 | -27.536 | 35.660 | 1.00 | 20.00 |

|      |     |     |     |   |     |        |         |        |      |       |
|------|-----|-----|-----|---|-----|--------|---------|--------|------|-------|
| ATOM | 521 | NZ  | LYS | C | 143 | 58.794 | -28.836 | 35.083 | 1.00 | 20.00 |
| ATOM | 522 | N   | GLY | C | 144 | 59.374 | -22.746 | 35.292 | 1.00 | 20.00 |
| ATOM | 523 | CA  | GLY | C | 144 | 60.363 | -22.170 | 36.185 | 1.00 | 20.00 |
| ATOM | 524 | C   | GLY | C | 144 | 61.472 | -23.143 | 36.530 | 1.00 | 20.00 |
| ATOM | 525 | O   | GLY | C | 144 | 61.213 | -24.280 | 36.924 | 1.00 | 20.00 |
| ATOM | 526 | N   | THR | C | 145 | 62.714 | -22.694 | 36.381 | 1.00 | 20.00 |
| ATOM | 527 | CA  | THR | C | 145 | 63.872 | -23.528 | 36.681 | 1.00 | 20.00 |
| ATOM | 528 | C   | THR | C | 145 | 64.464 | -23.179 | 38.042 | 1.00 | 20.00 |
| ATOM | 529 | O   | THR | C | 145 | 65.584 | -23.576 | 38.363 | 1.00 | 20.00 |
| ATOM | 530 | CB  | THR | C | 145 | 64.964 | -23.384 | 35.605 | 1.00 | 20.00 |
| ATOM | 531 | OG1 | THR | C | 145 | 65.489 | -22.051 | 35.627 | 1.00 | 20.00 |
| ATOM | 532 | CG2 | THR | C | 145 | 64.394 | -23.677 | 34.225 | 1.00 | 20.00 |
| ATOM | 533 | N   | GLY | C | 146 | 63.704 | -22.435 | 38.839 | 1.00 | 20.00 |
| ATOM | 534 | CA  | GLY | C | 146 | 64.150 | -22.032 | 40.160 | 1.00 | 20.00 |
| ATOM | 535 | C   | GLY | C | 146 | 64.197 | -23.191 | 41.135 | 1.00 | 20.00 |
| ATOM | 536 | O   | GLY | C | 146 | 64.463 | -24.330 | 40.750 | 1.00 | 20.00 |
| ATOM | 537 | N   | ARG | C | 147 | 63.937 | -22.900 | 42.406 | 1.00 | 20.00 |
| ATOM | 538 | CA  | ARG | C | 147 | 63.948 | -23.924 | 43.444 | 1.00 | 20.00 |
| ATOM | 539 | C   | ARG | C | 147 | 62.953 | -25.070 | 43.292 | 1.00 | 20.00 |
| ATOM | 540 | O   | ARG | C | 147 | 63.340 | -26.210 | 43.036 | 1.00 | 20.00 |
| ATOM | 541 | CB  | ARG | C | 147 | 63.664 | -23.302 | 44.813 | 1.00 | 20.00 |
| ATOM | 542 | CG  | ARG | C | 147 | 64.796 | -22.440 | 45.349 | 1.00 | 20.00 |
| ATOM | 543 | CD  | ARG | C | 147 | 64.406 | -21.767 | 46.655 | 1.00 | 20.00 |
| ATOM | 544 | NE  | ARG | C | 147 | 65.455 | -20.880 | 47.148 | 1.00 | 20.00 |
| ATOM | 545 | CZ  | ARG | C | 147 | 65.352 | -20.138 | 48.246 | 1.00 | 20.00 |
| ATOM | 546 | NH1 | ARG | C | 147 | 64.242 | -20.175 | 48.971 | 1.00 | 20.00 |
| ATOM | 547 | NH2 | ARG | C | 147 | 66.358 | -19.359 | 48.620 | 1.00 | 20.00 |
| ATOM | 548 | N   | LYS | C | 148 | 61.671 | -24.760 | 43.453 | 1.00 | 20.00 |
| ATOM | 549 | CA  | LYS | C | 148 | 60.619 | -25.762 | 43.333 | 1.00 | 20.00 |
| ATOM | 550 | C   | LYS | C | 148 | 59.794 | -25.397 | 42.103 | 1.00 | 20.00 |
| ATOM | 551 | O   | LYS | C | 148 | 58.566 | -25.346 | 42.161 | 1.00 | 20.00 |
| ATOM | 552 | CB  | LYS | C | 148 | 59.715 | -25.856 | 44.563 | 1.00 | 20.00 |
| ATOM | 553 | CG  | LYS | C | 148 | 60.408 | -26.395 | 45.804 | 1.00 | 20.00 |
| ATOM | 554 | CD  | LYS | C | 148 | 59.468 | -26.414 | 46.998 | 1.00 | 20.00 |
| ATOM | 555 | CE  | LYS | C | 148 | 60.137 | -27.027 | 48.217 | 1.00 | 20.00 |
| ATOM | 556 | NZ  | LYS | C | 148 | 59.232 | -27.038 | 49.400 | 1.00 | 20.00 |
| ATOM | 557 | N   | GLY | C | 149 | 60.478 | -25.143 | 40.992 | 1.00 | 20.00 |
| ATOM | 558 | CA  | GLY | C | 149 | 59.814 | -24.782 | 39.754 | 1.00 | 20.00 |
| ATOM | 559 | C   | GLY | C | 149 | 59.466 | -23.308 | 39.692 | 1.00 | 20.00 |
| ATOM | 560 | O   | GLY | C | 149 | 58.732 | -22.870 | 38.806 | 1.00 | 20.00 |
| ATOM | 561 | N   | ARG | C | 150 | 59.996 | -22.540 | 40.639 | 1.00 | 20.00 |
| ATOM | 562 | CA  | ARG | C | 150 | 59.740 | -21.106 | 40.694 | 1.00 | 20.00 |
| ATOM | 563 | C   | ARG | C | 150 | 60.333 | -20.393 | 39.483 | 1.00 | 20.00 |
| ATOM | 564 | O   | ARG | C | 150 | 61.489 | -20.617 | 39.123 | 1.00 | 20.00 |
| ATOM | 565 | CB  | ARG | C | 150 | 60.307 | -20.510 | 41.984 | 1.00 | 20.00 |
| ATOM | 566 | CG  | ARG | C | 150 | 60.472 | -18.999 | 41.950 | 1.00 | 20.00 |
| ATOM | 567 | CD  | ARG | C | 150 | 61.082 | -18.482 | 43.243 | 1.00 | 20.00 |
| ATOM | 568 | NE  | ARG | C | 150 | 60.361 | -18.960 | 44.418 | 1.00 | 20.00 |
| ATOM | 569 | CZ  | ARG | C | 150 | 59.210 | -18.450 | 44.847 | 1.00 | 20.00 |
| ATOM | 570 | NH1 | ARG | C | 150 | 58.645 | -17.443 | 44.196 | 1.00 | 20.00 |
| ATOM | 571 | NH2 | ARG | C | 150 | 58.624 | -18.948 | 45.927 | 1.00 | 20.00 |
| ATOM | 572 | N   | ILE | C | 151 | 59.534 | -19.533 | 38.859 | 1.00 | 20.00 |
| ATOM | 573 | CA  | ILE | C | 151 | 59.978 | -18.787 | 37.687 | 1.00 | 20.00 |

|      |     |     |     |   |     |        |         |        |      |       |
|------|-----|-----|-----|---|-----|--------|---------|--------|------|-------|
| ATOM | 574 | C   | ILE | C | 151 | 60.907 | -17.644 | 38.081 | 1.00 | 20.00 |
| ATOM | 575 | O   | ILE | C | 151 | 60.528 | -16.759 | 38.849 | 1.00 | 20.00 |
| ATOM | 576 | CB  | ILE | C | 151 | 58.786 | -18.218 | 36.896 | 1.00 | 20.00 |
| ATOM | 577 | CG1 | ILE | C | 151 | 57.880 | -19.351 | 36.408 | 1.00 | 20.00 |
| ATOM | 578 | CG2 | ILE | C | 151 | 59.275 | -17.379 | 35.726 | 1.00 | 20.00 |
| ATOM | 579 | CD1 | ILE | C | 151 | 56.553 | -18.877 | 35.857 | 1.00 | 20.00 |
| ATOM | 580 | N   | LEU | C | 152 | 62.125 | -17.668 | 37.550 | 1.00 | 20.00 |
| ATOM | 581 | CA  | LEU | C | 152 | 63.110 | -16.634 | 37.843 | 1.00 | 20.00 |
| ATOM | 582 | C   | LEU | C | 152 | 63.097 | -15.542 | 36.779 | 1.00 | 20.00 |
| ATOM | 583 | O   | LEU | C | 152 | 62.529 | -15.719 | 35.701 | 1.00 | 20.00 |
| ATOM | 584 | CB  | LEU | C | 152 | 64.509 | -17.242 | 37.955 | 1.00 | 20.00 |
| ATOM | 585 | CG  | LEU | C | 152 | 64.705 | -18.296 | 39.047 | 1.00 | 20.00 |
| ATOM | 586 | CD1 | LEU | C | 152 | 66.018 | -19.038 | 38.849 | 1.00 | 20.00 |
| ATOM | 587 | CD2 | LEU | C | 152 | 64.649 | -17.657 | 40.426 | 1.00 | 20.00 |
| ATOM | 588 | N   | ARG | C | 153 | 63.727 | -14.413 | 37.089 | 1.00 | 20.00 |
| ATOM | 589 | CA  | ARG | C | 153 | 63.798 | -13.295 | 36.156 | 1.00 | 20.00 |
| ATOM | 590 | C   | ARG | C | 153 | 64.421 | -13.729 | 34.834 | 1.00 | 20.00 |
| ATOM | 591 | O   | ARG | C | 153 | 63.960 | -13.338 | 33.761 | 1.00 | 20.00 |
| ATOM | 592 | CB  | ARG | C | 153 | 64.600 | -12.142 | 36.762 | 1.00 | 20.00 |
| ATOM | 593 | CG  | ARG | C | 153 | 64.705 | -10.920 | 35.864 | 1.00 | 20.00 |
| ATOM | 594 | CD  | ARG | C | 153 | 65.492 | -9.807  | 36.536 | 1.00 | 20.00 |
| ATOM | 595 | NE  | ARG | C | 153 | 65.602 | -8.625  | 35.686 | 1.00 | 20.00 |
| ATOM | 596 | CZ  | ARG | C | 153 | 66.546 | -8.453  | 34.766 | 1.00 | 20.00 |
| ATOM | 597 | NH1 | ARG | C | 153 | 67.468 | -9.388  | 34.574 | 1.00 | 20.00 |
| ATOM | 598 | NH2 | ARG | C | 153 | 66.569 | -7.346  | 34.036 | 1.00 | 20.00 |
| ATOM | 599 | N   | GLU | C | 154 | 65.470 | -14.541 | 34.918 | 1.00 | 20.00 |
| ATOM | 600 | CA  | GLU | C | 154 | 66.151 | -15.039 | 33.730 | 1.00 | 20.00 |
| ATOM | 601 | C   | GLU | C | 154 | 65.208 | -15.878 | 32.875 | 1.00 | 20.00 |
| ATOM | 602 | O   | GLU | C | 154 | 65.271 | -15.843 | 31.646 | 1.00 | 20.00 |
| ATOM | 603 | CB  | GLU | C | 154 | 67.380 | -15.861 | 34.120 | 1.00 | 20.00 |
| ATOM | 604 | CG  | GLU | C | 154 | 68.564 | -15.027 | 34.580 | 1.00 | 20.00 |
| ATOM | 605 | CD  | GLU | C | 154 | 68.630 | -13.678 | 33.890 | 1.00 | 20.00 |
| ATOM | 606 | OE1 | GLU | C | 154 | 67.865 | -12.771 | 34.281 | 1.00 | 20.00 |
| ATOM | 607 | OE2 | GLU | C | 154 | 69.446 | -13.525 | 32.957 | 1.00 | 20.00 |
| ATOM | 608 | N   | ASP | C | 155 | 64.333 | -16.632 | 33.534 | 1.00 | 20.00 |
| ATOM | 609 | CA  | ASP | C | 155 | 63.368 | -17.472 | 32.836 | 1.00 | 20.00 |
| ATOM | 610 | C   | ASP | C | 155 | 62.483 | -16.637 | 31.918 | 1.00 | 20.00 |
| ATOM | 611 | O   | ASP | C | 155 | 62.243 | -17.004 | 30.768 | 1.00 | 20.00 |
| ATOM | 612 | CB  | ASP | C | 155 | 62.507 | -18.244 | 33.838 | 1.00 | 20.00 |
| ATOM | 613 | CG  | ASP | C | 155 | 63.256 | -19.388 | 34.491 | 1.00 | 20.00 |
| ATOM | 614 | OD1 | ASP | C | 155 | 62.857 | -19.807 | 35.598 | 1.00 | 20.00 |
| ATOM | 615 | OD2 | ASP | C | 155 | 64.245 | -19.868 | 33.898 | 1.00 | 20.00 |
| ATOM | 616 | N   | VAL | C | 156 | 62.002 | -15.510 | 32.433 | 1.00 | 20.00 |
| ATOM | 617 | CA  | VAL | C | 156 | 61.155 | -14.613 | 31.657 | 1.00 | 20.00 |
| ATOM | 618 | C   | VAL | C | 156 | 61.946 | -13.962 | 30.528 | 1.00 | 20.00 |
| ATOM | 619 | O   | VAL | C | 156 | 61.450 | -13.823 | 29.410 | 1.00 | 20.00 |
| ATOM | 620 | CB  | VAL | C | 156 | 60.538 | -13.514 | 32.541 | 1.00 | 20.00 |
| ATOM | 621 | CG1 | VAL | C | 156 | 59.635 | -12.613 | 31.713 | 1.00 | 20.00 |
| ATOM | 622 | CG2 | VAL | C | 156 | 59.769 | -14.133 | 33.698 | 1.00 | 20.00 |
| ATOM | 623 | N   | GLN | C | 157 | 63.177 | -13.564 | 30.828 | 1.00 | 20.00 |
| ATOM | 624 | CA  | GLN | C | 157 | 64.038 | -12.924 | 29.840 | 1.00 | 20.00 |
| ATOM | 625 | C   | GLN | C | 157 | 64.424 | -13.897 | 28.731 | 1.00 | 20.00 |
| ATOM | 626 | O   | GLN | C | 157 | 64.492 | -13.523 | 27.560 | 1.00 | 20.00 |



SD Figure S1. Heat map representation of deuterium exchange results for E2 in the presence and absence of E3.

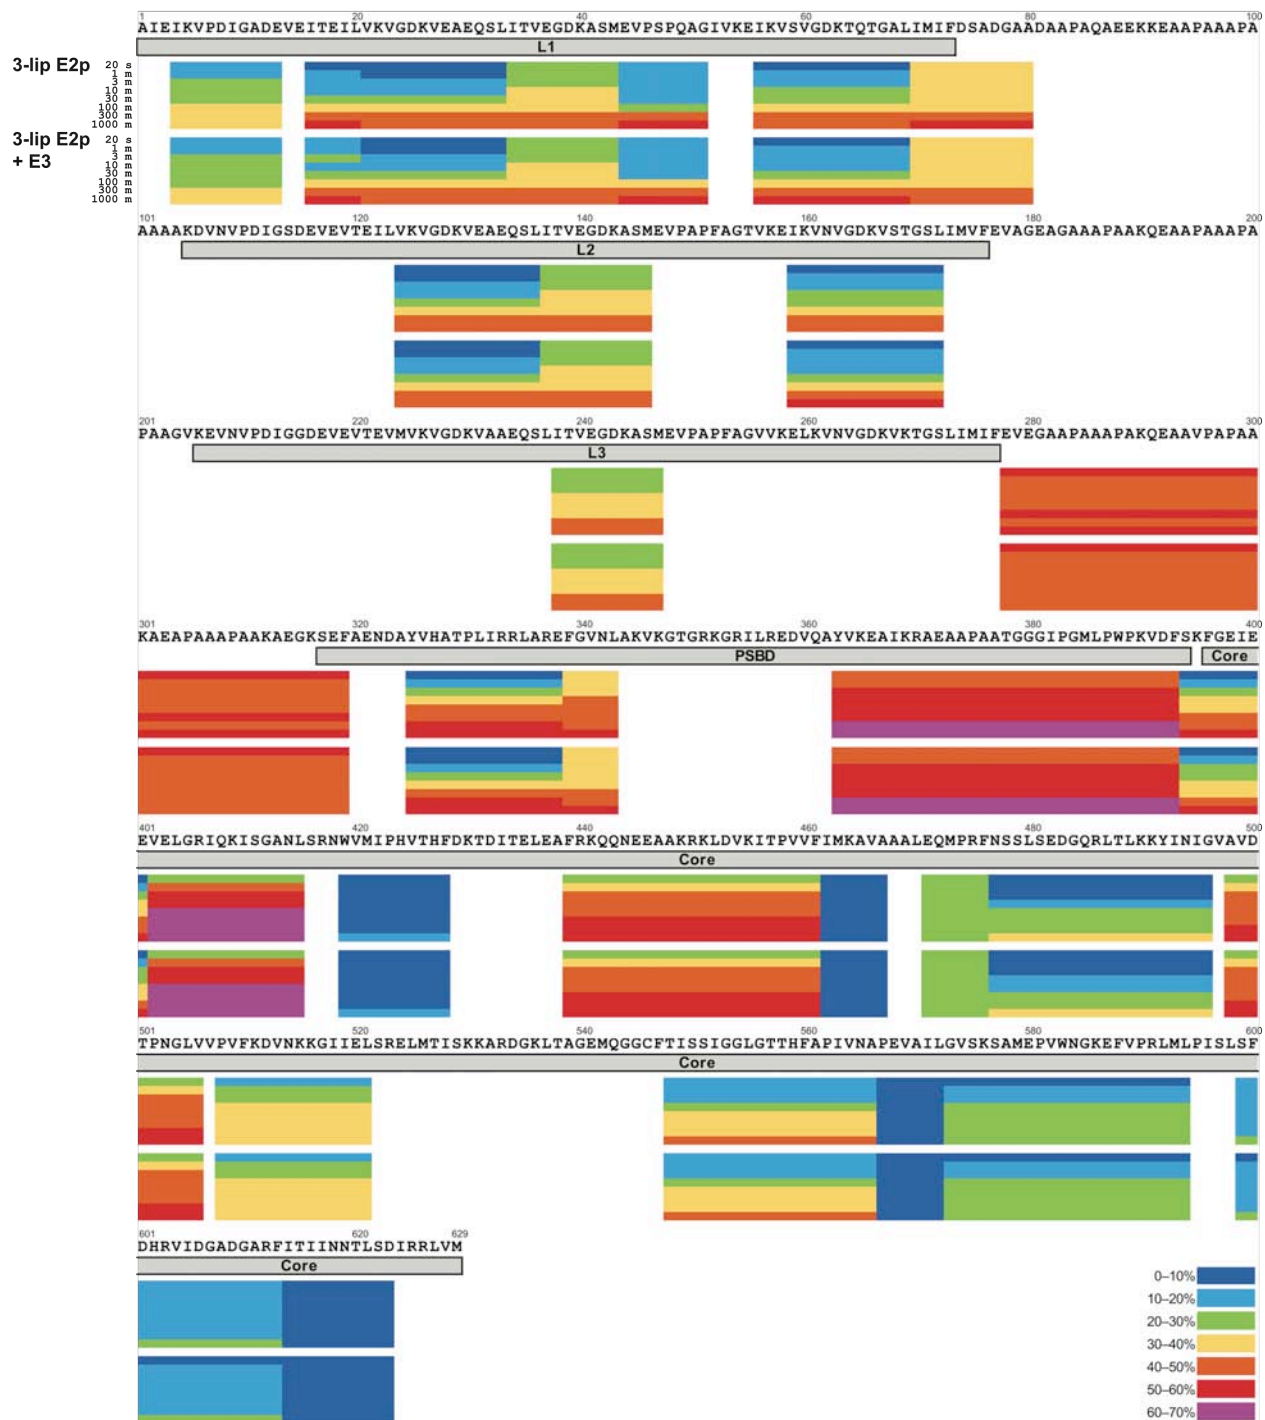

SI Figure S2. Heat map representation of deuterium exchange results for E3 in the presence and absence of E2

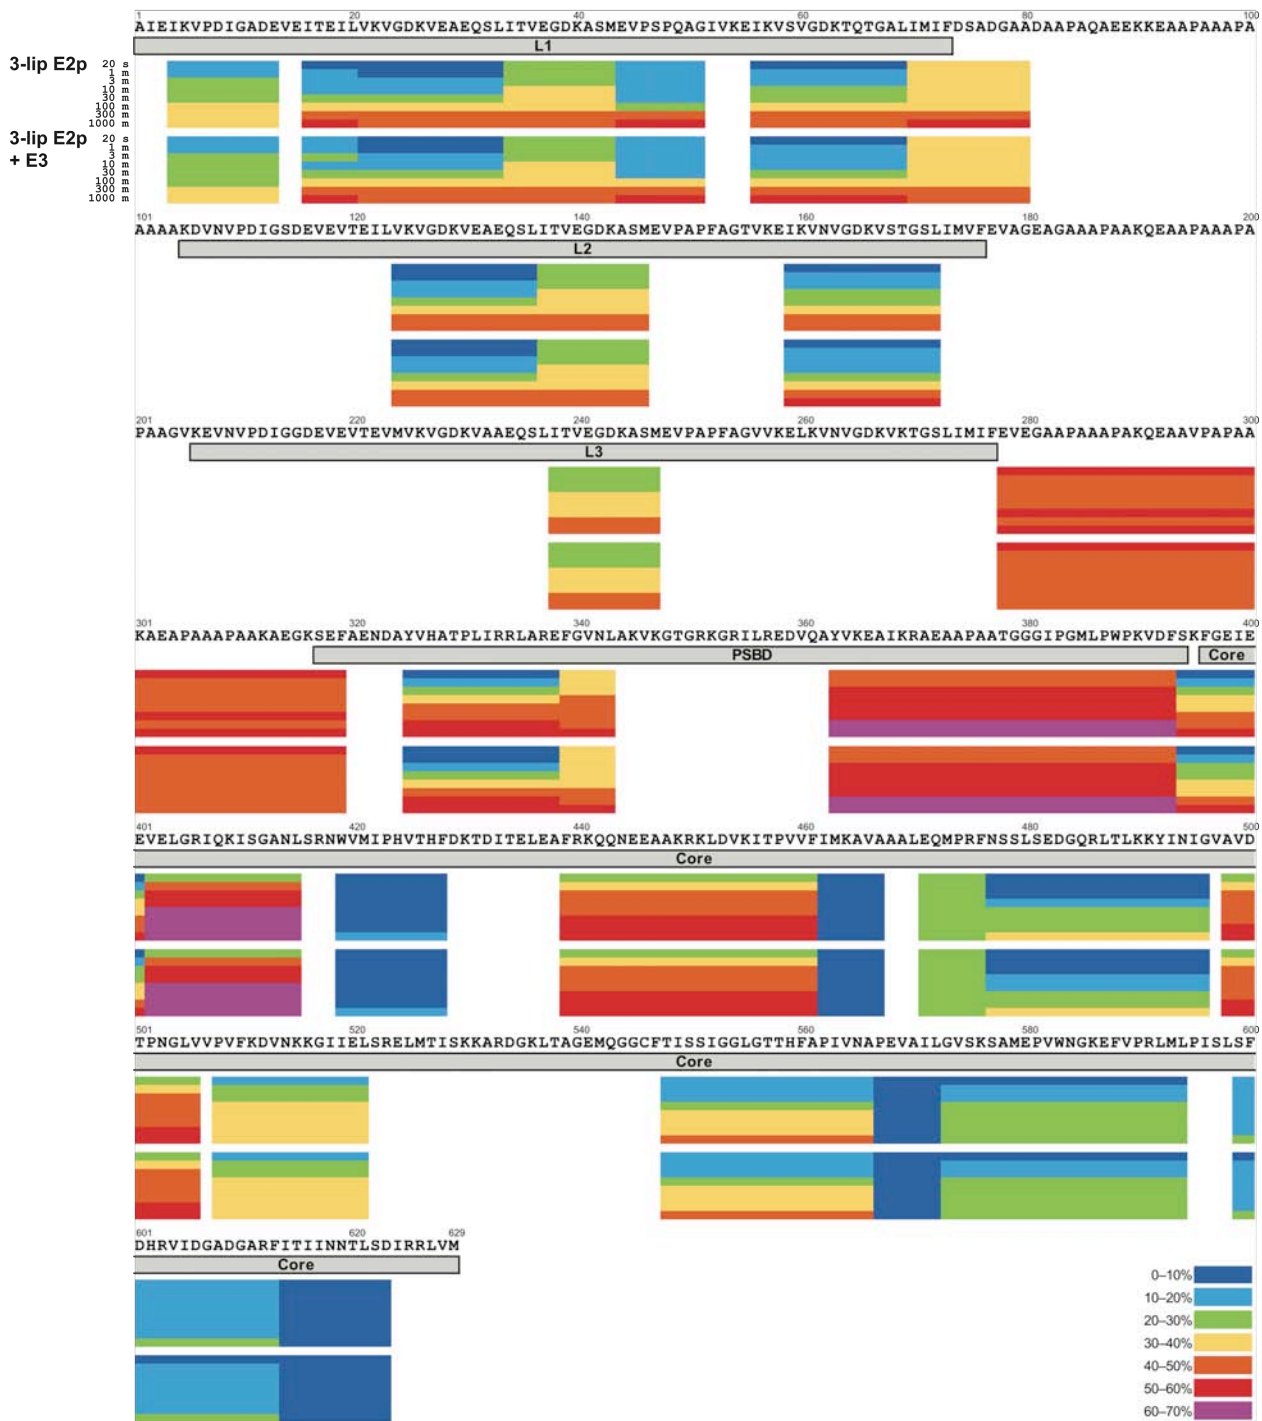

Supplement: supp_M113.466789_jbc.M113.466789-1.pdf [file supp_M113.466789_jbc.M113.466789-1.pdf]
